# Supplementary material for: An integrated temporary negative pressure assisted microfluidic chip for DNA isolation and digital PCR detection
Source: Royal Society of Chemistry journal article supplement (doi:10.1039/c5ra18166f), 2015-01-01
Supplement: c5ra18166f1.pdf [file c5ra18166f1.pdf]

## An integrated temporary negative pressure assisted microfluidic chip for DNA purification and digital PCR detection

Qingchang Tian<sup>#a</sup>, Baodong Yu<sup>&b</sup>, Ying Mu<sup>\*a</sup>, Yanan Xu<sup>a</sup>, Congcong Ma<sup>a</sup>, Tao Zhang<sup>a</sup>, Wei Jin<sup>a</sup>, Qinhan Jin<sup>a</sup>

5

<sup>a</sup>Research Center for Analytical Instrumentation, Institute of CyberSystems and Control, State Key Laboratory of Industrial Control Technology, Zhejiang University, Hangzhou 310058, Zhejiang, P. R. China.

E-mail: muying@zju.edu.cn; Fax: +86 571-88208382;

Tel: +86 571-88208383

10 <sup>b</sup>China-Japan Union Hospital of Jilin University, Changchun, 130021, Jilin, P. R. China.

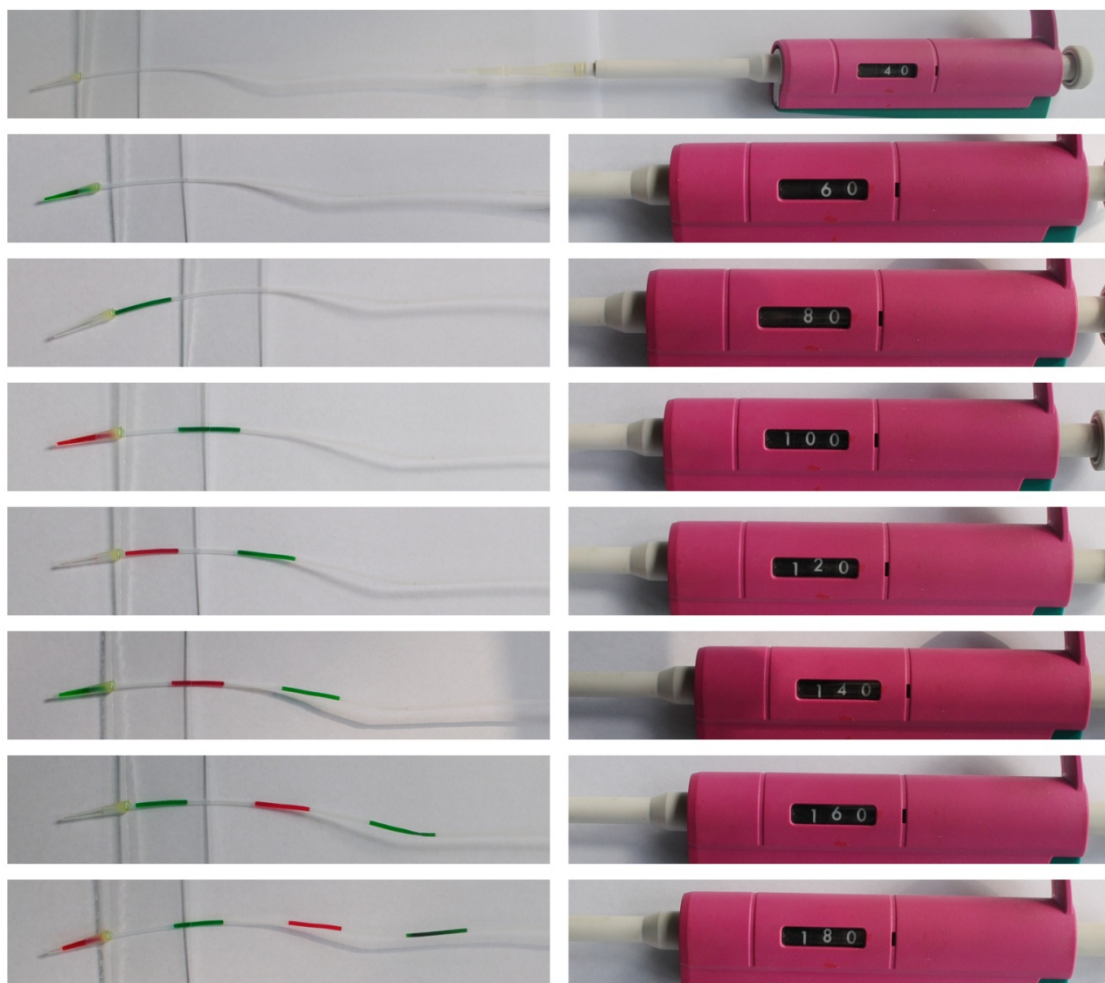

FIG. S1. Reagent segments were loaded into Teflon tube with the help of pipettor.

5

**Table S1. The statistical analysis result of the digital PCR**

| $X_{dil}$ | Observed value |     |     | Average value | STDEV       | $-\ln(1-f_0)$ | $-\ln(1-STDEV/2560)$ |
|-----------|----------------|-----|-----|---------------|-------------|---------------|----------------------|
| 0.0016    | 10             | 18  | 14  | 14            | 4           | 0.00548376    | 0.00156372           |
| 0.008     | 60             | 62  | 69  | 63.66666667   | 4.725815626 | 0.02518427    | 0.00184773           |
| 0.04      | 252            | 248 | 258 | 252.6666667   | 5.033222957 | 0.1039148     | 0.00196804           |
| 0.2       | 942            | 958 | 949 | 949.6666667   | 8.020806277 | 0.46356606    | 0.00313805           |

10

15

**Table S2. The statistical analysis result of the real-time PCR**

| $\ln(X_{dil})$ | Ct value |       |      | Average Ct value | STDEV       |
|----------------|----------|-------|------|------------------|-------------|
| 6.437752       | 36.62    | 37.05 | 37   | 36.89266667      | 0.234717561 |
| 4.828314       | 33.2     | 33.4  | 34.1 | 33.56866667      | 0.481049201 |
| 3.218876       | 30.4     | 30.38 | 30.5 | 30.43066667      | 0.073934656 |
| 1.609438       | 26.34    | 27.01 | 27.1 | 26.82233333      | 0.425483646 |
| 0              | 22.39    | 22.69 | 22.7 | 22.57733333      | 0.162666325 |

20

25

**Table S3. The statistical analysis result of the real time PCR**

| Gradients    | Samples | DNA concentration (ng/ $\mu$ L) | Average | Standard deviation | Results of Mann-Witney U statistical test |
|--------------|---------|---------------------------------|---------|--------------------|-------------------------------------------|
| $WR=10^{-3}$ | 3       | 0.725                           | 0.747   | 0.067              | $P=0.127 > 0.05$                          |
|              | 3       | 0.823                           |         |                    |                                           |
|              | 3       | 0.694                           | 0.628   | 0.119              |                                           |
|              | 4       | 0.494                           |         |                    |                                           |
|              | 4       | 0.671                           |         |                    |                                           |
|              | 4       | 0.72                            |         |                    |                                           |

Amplification Plot

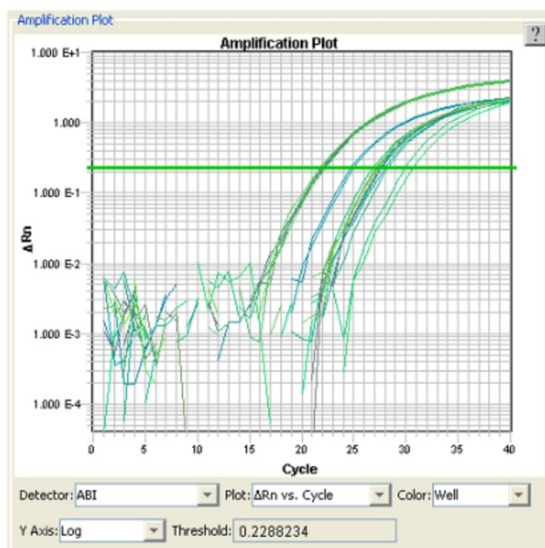

Standard Curve Plot

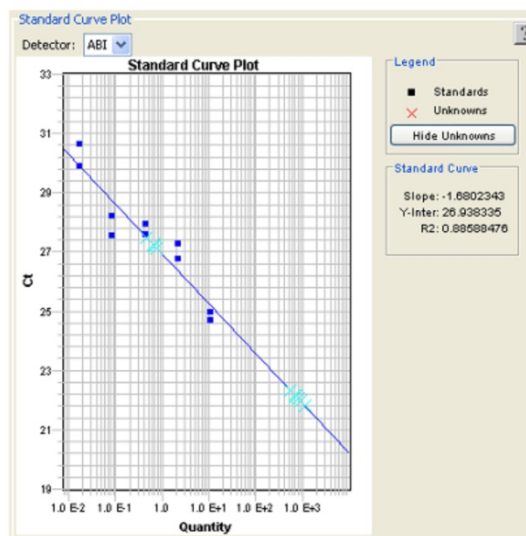

FIG. S2. Amplification plot and standard curve plot of qPCR

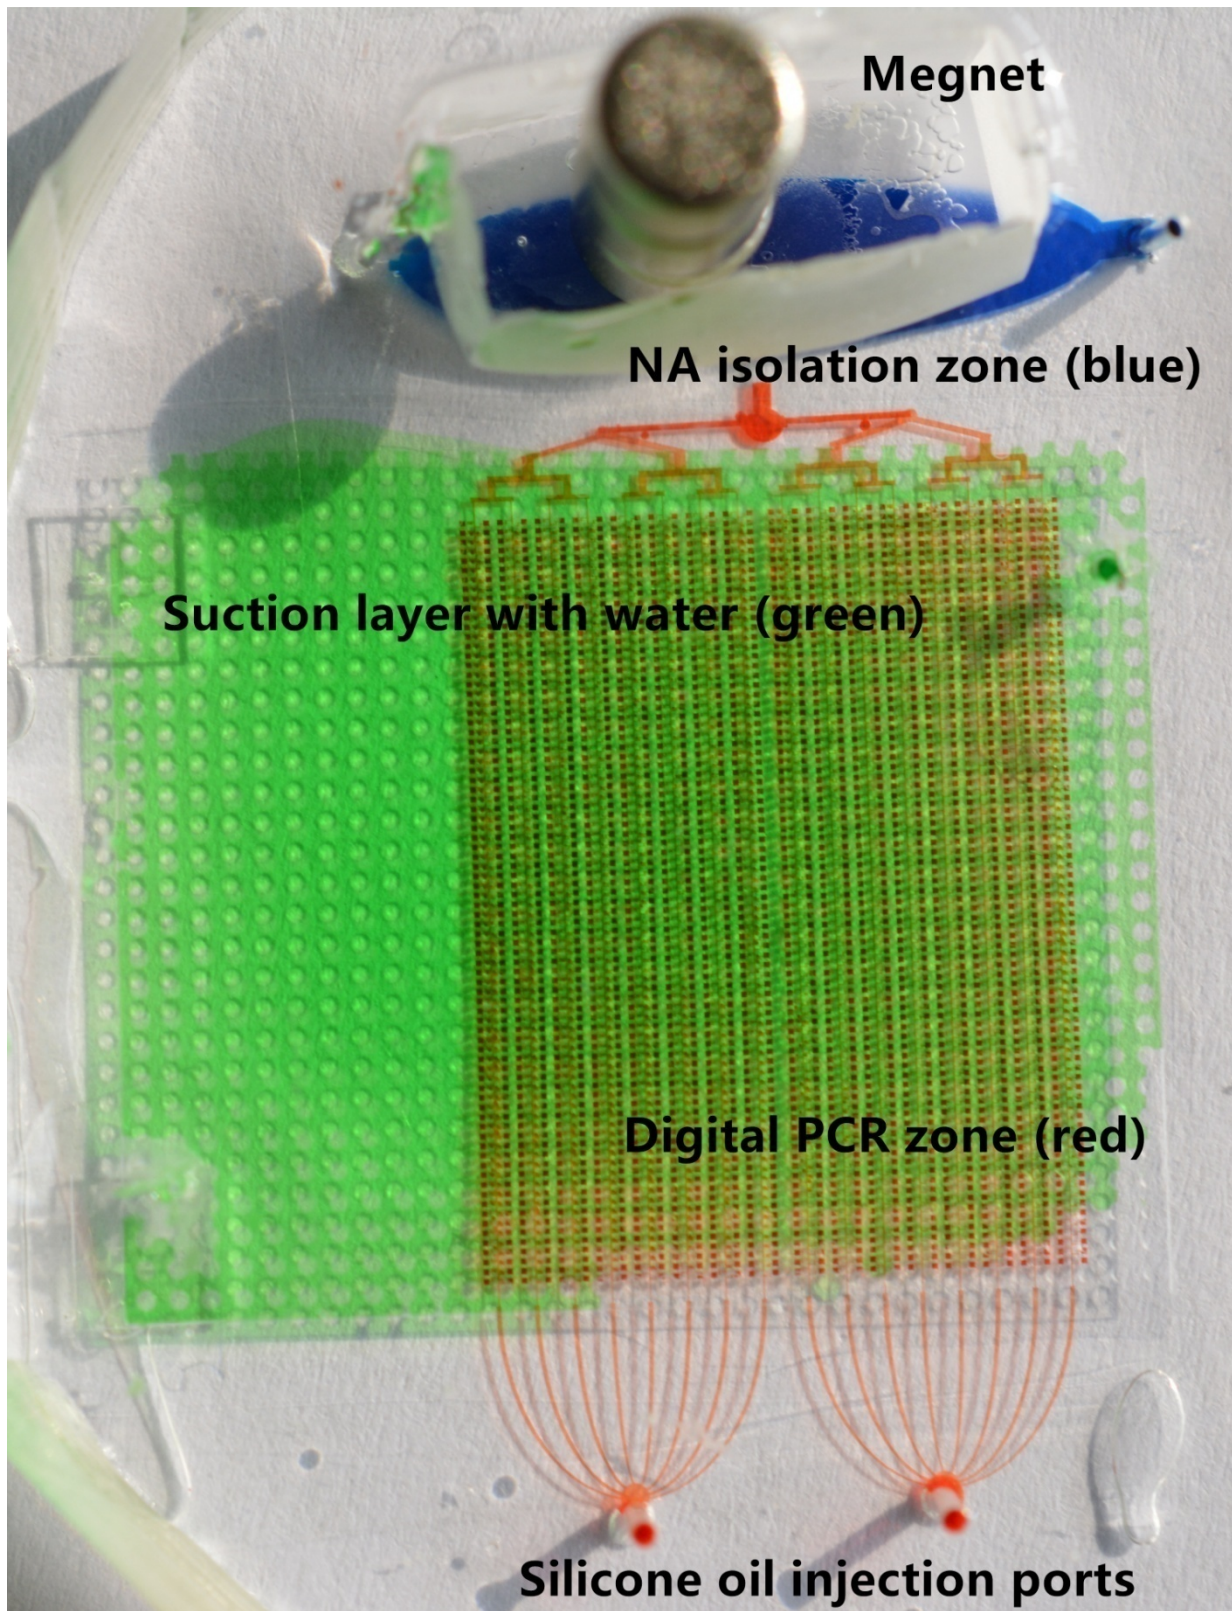

Fig. S3 Photograph of the microdevice. Reagent (blue) could pass through the NA isolation zone from inlet to outlet 1 and could not enter the digital PCR zone (red) under negative pressure from outlet 2. The area of suction layer (green) was larger than the digital PCR layer (red) which was loaded water to avoid evaporation and ensure the efficiency of PCR in each chamber.

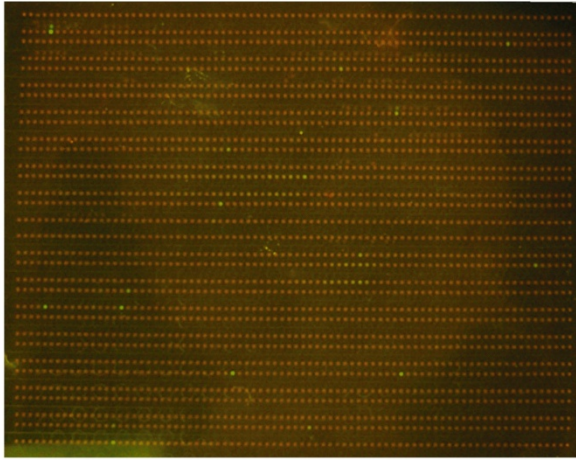

**$X_{dil}=0.0016$**

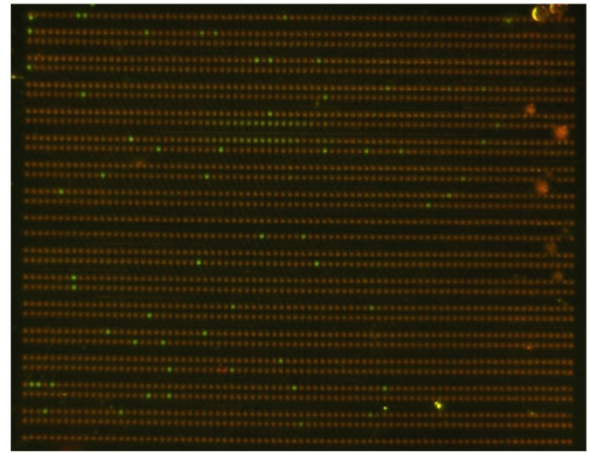

**$X_{dil}=0.008$**

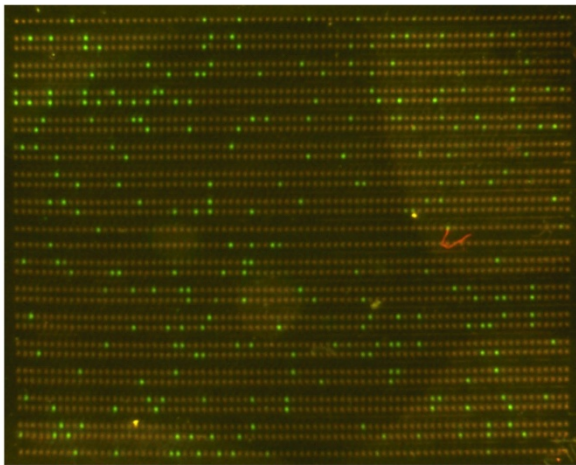

**$X_{dil}=0.04$**

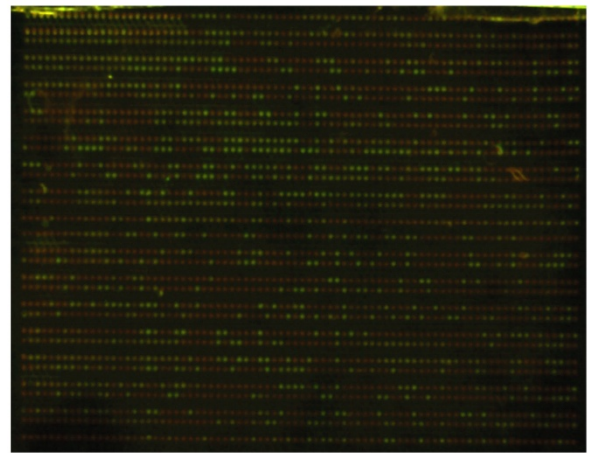

**$X_{dil}=0.2$**

5 **FIG. S4** Digital PCR fluorescent images with a serial dilution of target GAPDH DNA template ranging from 0.0016 to 0.2 dilutions.

10

15

## Amplification Plot

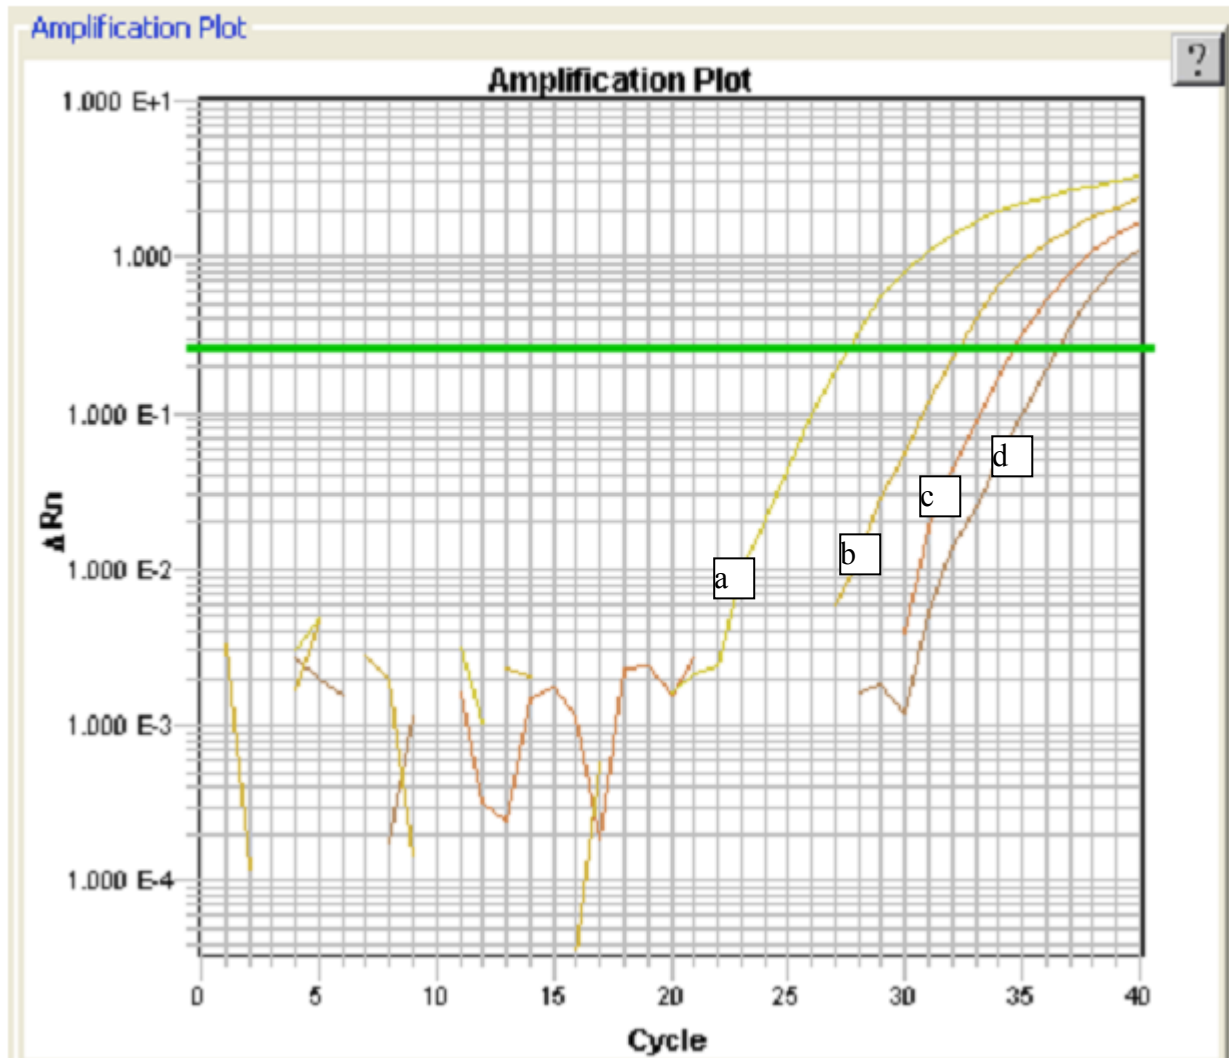

FIG. S5 Amplification plot of different concentrations of bovine lysate. a,  $WR=10^{-7}$ ; b,  $WR=10^{-8}$ ; c,  $WR=10^{-9}$ ; d,  $WR=10^{-10}$ .

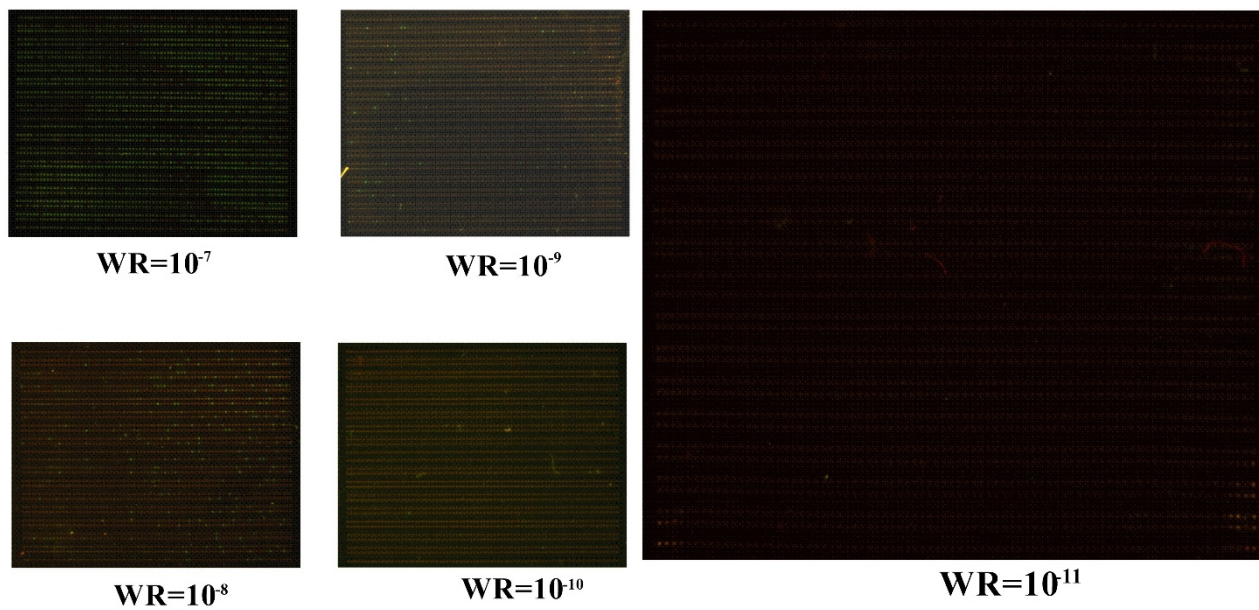

Fig. S6 Digital PCR fluorescent images (partly in Fig. 5) on the microdevice with different concentrations of bovine lysate.
